# Supplementary material for: Rational design for the fabrication of bulk Ni3Sn2 alloy catalysts for the synthesis of 1,4-pentanediol from biomass-derived furfural without acidic co-catalysts
Source: Royal Society of Chemistry journal article supplement (doi:10.1039/d3ra03642a), 2023-01-01
Supplement: d3ra03642a1.pdf [file d3ra03642a1.pdf]

Supplementary Information for

## Rational design of the fabrication of bulk $\text{Ni}_3\text{Sn}_2$ alloy catalysts for the synthesis of 1,4-pentanediol from biomass-derived furfural without acidic co-catalyst

Rodiansono,<sup>\*a,b</sup> Atina Sabila Azzahra,<sup>b</sup> Pathur Razi Ansyah,<sup>c</sup> Sadang Husain,<sup>d</sup> and Shogo Shimazu<sup>e</sup>

<sup>a</sup>Department of Chemistry, Lambung Mangkurat University, Jl. A. Yani Km 36 Banjarbaru, Indonesia 70714

<sup>b</sup>Inorganic Materials & Catalysis Laboratory (IMCat), Catalysis for Sustainable Energy and Environment (CATSuRe), Lambung Mangkurat University.

<sup>c</sup>Department of Physics, Lambung Mangkurat University, Jl. A. Yani Km 36 Banjarbaru, Indonesia 70714.

<sup>d</sup>Department of Mechanical Engineering, Lambung Mangkurat University, Jl. A. Yani Km 35 Banjarbaru, Indonesia 70714.

<sup>e</sup>Graduate School of Engineering, Chiba University, 1-33 Yayoi, Inage-ku, Chiba, Japan 263-8522

\*Corresponding author: [rodiansono@ulm.ac.id](mailto:rodiansono@ulm.ac.id) (R. Rodiansono); Tel./fax.: +625114773112

### Contents

1. Specific surface area BET ( $S_{\text{BET}}$ ) and average crystallite sizes of  $\text{Ni}_3\text{Sn}_2(101)$  alloy phase bulk Ni-Sn(1.5) synthesized at different parameters (**Table S1**).
2. Identified Ni-Sn alloy phases from bulk Ni-Sn(1.5) after reduction with  $\text{H}_2$  at 673-873 K for 1.5 h (**Table S2**).
3. Calculated lattice parameters (d/nm) of  $\text{Ni}_3\text{Sn}_2$  alloy obtained at different pH of Ni-Sn solution. The data referred to the XRD patterns in Fig. 7 (in the text) at  $2\theta = \sim 44.2$  ( $\text{Ni}_3\text{Sn}_2$  (110) phase (**Table S3**)).
4. XRD patterns of the bulk Ni-Sn(1.5) synthesized at different hydrothermal time of 0-72 h at 423 K followed by reduction with  $\text{H}_2$  at 673 K for 1.5 h (**Figure S1**).
5. Calculated lattice parameters (d/nm) of  $\text{Ni}_3\text{Sn}_2$  alloy obtained at different hydrothermal time. The data referred to the XRD patterns in Fig. S1 at  $2\theta = \sim 44.2$  ( $\text{Ni}_3\text{Sn}_2$  (110) phase (**Table S4**)).
6. XRD patterns of the as-prepared bulk Ni-Sn(1.5) with different conditions (**Figure S2**).
7. XRD patterns of the bulk Ni-Sn(1.5) synthesized in the presence of polyols (a) ethylene glycol (EG), (b) 2-methoxyethanol, and (c) without the addition of polyols during the hydrothermal at 423 K for 24 h, followed by reduction with  $\text{H}_2$  at 673 K for 1.5 h (**Figure S3**).
8. Calculated lattice parameter ( $d$  (nm)) of  $\text{Ni}_3\text{Sn}_2$  samples obtained at the effect of EG, methoxy ethanol, and without polyol additives. The data referred to the XRD patterns in Fig. S3 at  $2\theta = \sim 44.2$  ( $\text{Ni}_3\text{Sn}_2$  (110) phase (**Table S5**)).
9. XRD patterns of the bulk Ni-Sn(1.5) synthesized at different temperature of hydrothermal (a) 423 K, (b) 473 K, and (c) 523 K for 24 h followed by reduction with  $\text{H}_2$  at 673 K for 1.5 h (**Figure S4**).
10. XRD patterns of bulk Ni-Sn(1.5) after reduction with  $\text{H}_2$  at (a) 573 K, (b) 673 K, (c) 773 K, and (d) 873 K for 1.5 h. The plotted data were compared with JCPDS card of #06-414 ( $\text{Ni}_3\text{Sn}_2$ ) (**Figure S5**).
11. Calculated lattice parameters (d/nm) of  $\text{Ni}_3\text{Sn}_2$  alloy obtained at reduction temperature. The data referred to the XRD patterns in Fig. S5 at  $2\theta = \sim 44.2$  ( $\text{Ni}_3\text{Sn}_2$  (110) phase (**Table S6**)).
12. XRD patterns of (a) fresh and (b) recovered bulk  $\text{Ni}_3\text{Sn}_2$  after the 52 h reaction run.  $\otimes$   $\text{Ni}_3\text{Sn}_2$  alloy phase, plotted data were compared with JCPDS card of #06-414 ( $\text{Ni}_3\text{Sn}_2$ ) (**Figure S6**).

## 1. Results of catalyst characterisation

**Table S1.** Specific surface area BET ( $S_{\text{BET}}$ ) and average crystallite sizes of  $\text{Ni}_3\text{Sn}_2(101)$  alloy phase of bulk Ni-Sn(1.5) alloy synthesized at different parameters

| Entry | Catalyst <sup>a</sup>                                                        | $S_{\text{BET}}^b$ (m <sup>2</sup> /g) | $D^c$ (nm) |
|-------|------------------------------------------------------------------------------|----------------------------------------|------------|
| 1     | $\text{Ni}_3\text{Sn}_2$ (2-Me-EtOH; pH = 8; 573 K/ $\text{H}_2$ )           | 9.7                                    | 14.0       |
| 2     | $\text{Ni}_3\text{Sn}_2$ (2-Me-EtOH; pH = 8; 673 K/ $\text{H}_2$ )           | 70.3                                   | 17.0       |
| 3     | $\text{Ni}_3\text{Sn}_2$ (2-Me-EtOH; pH = 8; 773 K/ $\text{H}_2$ )           | 1.7                                    | 26.5       |
| 4     | $\text{Ni}_3\text{Sn}_2$ (2-Me-EtOH; pH = 8; 873 K/ $\text{H}_2$ )           | 2.9                                    | 28.4       |
| 5     | $\text{Ni}_3\text{Sn}_2$ (2-Me-EtOH; pH = 8; HT 12 h; 673 K/ $\text{H}_2$ )  | 21.6                                   | 13.7       |
| 6     | $\text{Ni}_3\text{Sn}_2$ (2-Me-EtOH; pH = 8; HT 48 h & 673 K/ $\text{H}_2$ ) | 10.6                                   | 19.4       |
| 7     | $\text{Ni}_3\text{Sn}_2$ (2-Me-EtOH; pH = 8; HT 72 h & 673 K/ $\text{H}_2$ ) | 31.4                                   | 16.8       |
| 8     | $\text{Ni}_3\text{Sn}_2$ (EG; pH = 8; 673 K/ $\text{H}_2$ )                  | 12.0                                   | 16.5       |
| 9     | $\text{Ni}_3\text{Sn}_2$ (without polyol; 673 K/ $\text{H}_2$ )              | 6.92                                   | 17.4       |

<sup>a</sup>The samples  $\text{Ni}_3\text{Sn}_2$  samples were synthesized at different parameters, unless otherwise stated. <sup>b</sup> Specific surface area BET ( $S_{\text{BET}}$ ) was derived from  $\text{N}_2$  physisorption at 77 K. <sup>c</sup> Average crystallite sizes of  $\text{Ni}_3\text{Sn}_2$  (101) alloy phase at  $2\theta = 30.1^\circ$  was calculated by using Scherrer's equation.

**Table S2.** Identified Ni–Sn alloy phases from bulk Ni-Sn(1.5) after reduction with  $\text{H}_2$  at 673–873 K for 1.5 h<sup>a</sup>

| Temperature of $\text{H}_2$ reduction (K)                                                                                                                                                                                                                                                                                                                    |                                                                                                                                                                                                                                                                                                                                                                    |                                                                                                                                                                                                                                                                                                         |
|--------------------------------------------------------------------------------------------------------------------------------------------------------------------------------------------------------------------------------------------------------------------------------------------------------------------------------------------------------------|--------------------------------------------------------------------------------------------------------------------------------------------------------------------------------------------------------------------------------------------------------------------------------------------------------------------------------------------------------------------|---------------------------------------------------------------------------------------------------------------------------------------------------------------------------------------------------------------------------------------------------------------------------------------------------------|
| 673                                                                                                                                                                                                                                                                                                                                                          | 773                                                                                                                                                                                                                                                                                                                                                                | 873                                                                                                                                                                                                                                                                                                     |
| 92% $\text{Ni}_3\text{Sn}_2$ alloy phase <sup>c</sup><br>$\text{Ni}_3\text{Sn}_2(101)$ , $\text{Ni}_3\text{Sn}_2(002)$ , $\text{Ni}_3\text{Sn}_2(102)$ ,<br>$\text{Ni}_3\text{Sn}_2(110)$ , $\text{Ni}_3\text{Sn}_2(201)$ , $\text{Ni}_3\text{Sn}_2(112)$ ,<br>$\text{Ni}_3\text{Sn}_2(103)$ , $\text{Ni}_3\text{Sn}_2(202)$ , $\text{Ni}_3\text{Sn}(002)$ , | 89% $\text{Ni}_3\text{Sn}_2$ alloy phase <sup>c</sup><br>$\text{Ni}_3\text{Sn}_2(101)$ , $\text{Ni}_3\text{Sn}_2(002)$ ,<br>$\text{Ni}_3\text{Sn}_2(102)$ , $\text{Ni}_3\text{Sn}_2(110)$ ,<br>$\text{Ni}_3\text{Sn}_2(201)$ , $\text{Ni}_3\text{Sn}_2(112)$ ,<br>$\text{Ni}_3\text{Sn}_2(103)$ , $\text{Ni}_3\text{Sn}_2(202)$ ,<br>$\text{Ni}_3\text{Sn}(002)$ , | $\text{Ni}_3\text{Sn}_2(101)$ , $\text{Ni}_3\text{Sn}_2(002)$ ,<br>$\text{Ni}_3\text{Sn}_2(102)$<br>$\text{Ni}_3\text{Sn}_2(110)$ , $\text{Ni}_3\text{Sn}_2(201)$ ,<br>$\text{Ni}_3\text{Sn}_2(112)$ , $\text{Ni}_3\text{Sn}_2(103)$ ,<br>$\text{Ni}_3\text{Sn}_2(202)$ , $\text{Ni}_3\text{Sn}(002)$ , |

The samples Ni-Sn(1.5) were synthesized at pH adjustment of 8, temperature hydrothermal of 423 K for 24 h, unless otherwise stated. <sup>a</sup>Based on the JCPDS-ICSD card of the existing Ni-Sn alloys and JCPDS card number of #06-414 for  $\text{Ni}_3\text{Sn}_2$  [1,2]. <sup>b</sup>Values in the parenthesis indicate the Ni/Sn molar ratio. <sup>c</sup>The Mol% of alloy component was calculated by Multi-Rietveld Analysis Program LH-Riet 7.00 method on the Rietica software.

**Table S3** Calculated lattice parameters ( $d$ /nm) of  $\text{Ni}_3\text{Sn}_2$  alloy obtained at different pH of Ni-Sn solution. The data referred to the XRD patterns in Fig. 7 (in the text) at  $2\theta = \sim 44.2$  ( $\text{Ni}_3\text{Sn}_2$  (110) phase).

| Entry | Sample                                                              | $d^a$ (nm) |
|-------|---------------------------------------------------------------------|------------|
| 1     | $\text{Ni}_3\text{Sn}_2$ (2-Me-EtOH; pH = 6; 673 K/ $\text{H}_2$ )  | 0,2057     |
| 2     | $\text{Ni}_3\text{Sn}_2$ (2-Me-EtOH; pH = 8; 673 K/ $\text{H}_2$ )  | 0,2057     |
| 3     | $\text{Ni}_3\text{Sn}_2$ (2-Me-EtOH; pH = 10; 673 K/ $\text{H}_2$ ) | 0,2055     |
| 4     | $\text{Ni}_3\text{Sn}_2$ (2-Me-EtOH; pH = 12; 673 K/ $\text{H}_2$ ) | 0,2054     |

<sup>a</sup>The basal spacing was calculated using Bragg's equation at  $2\theta = \sim 44.2$  ( $\text{Ni}_3\text{Sn}_2$  (110) phase).

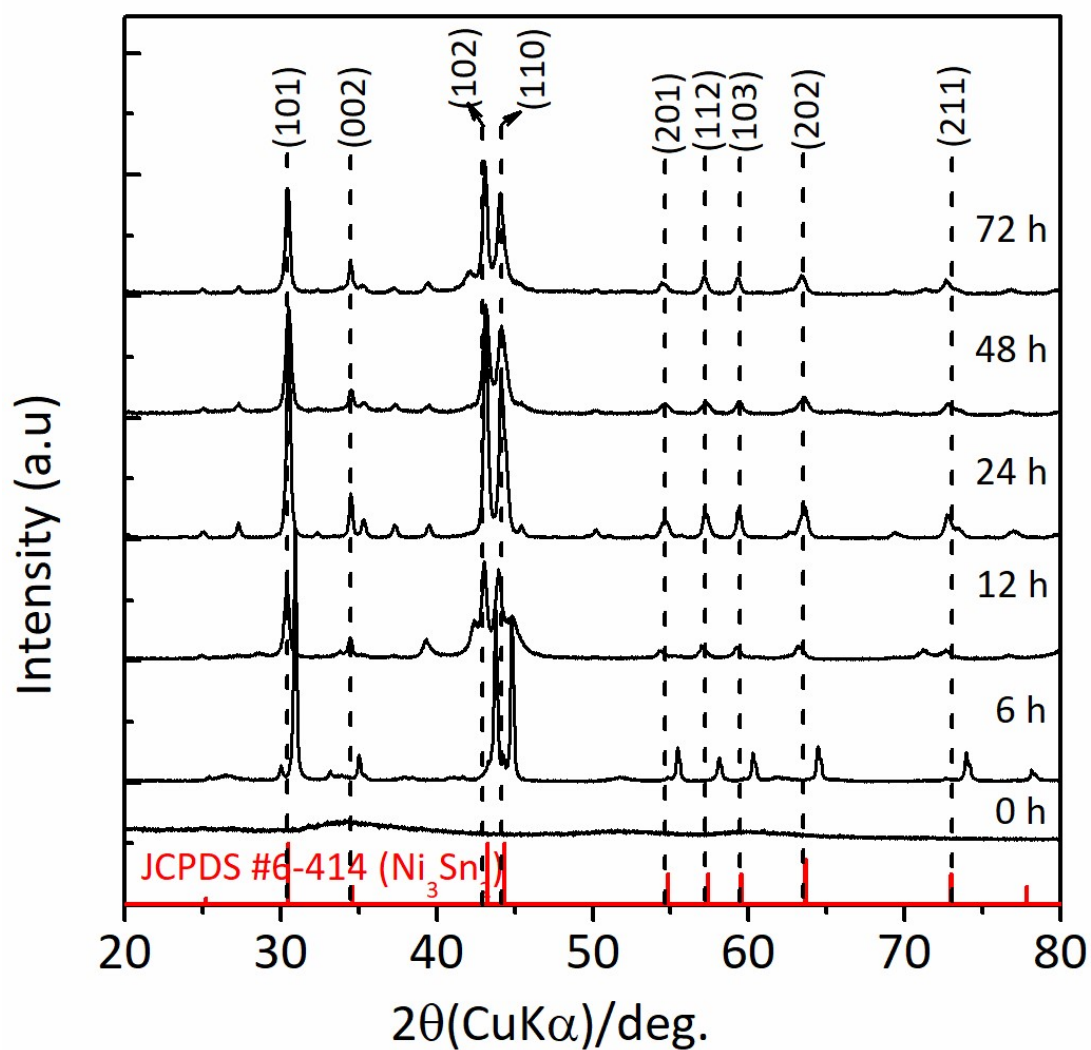

**Figure S1.** XRD patterns of the bulk Ni-Sn(1.5) synthesized at different hydrothermal time of 0-72 h at 423 K after reduction with H<sub>2</sub> at 673 K for 1.5 h.

**Table S4** Calculated lattice parameters (*d*/nm) of Ni<sub>3</sub>Sn<sub>2</sub> alloy obtained at different hydrothermal time. The data referred to the XRD patterns in Fig. S1 at 2θ = ~44.2 (Ni<sub>3</sub>Sn<sub>2</sub> (110) phase).

| Entry | Sample                                                                           | <i>d</i> <sup>a</sup> (nm) |
|-------|----------------------------------------------------------------------------------|----------------------------|
| 1     | Ni <sub>3</sub> Sn <sub>2</sub> (2-Me-EtOH; pH = 8; 12 h; 673 K/H <sub>2</sub> ) | 0,2061                     |
| 2     | Ni <sub>3</sub> Sn <sub>2</sub> (2-Me-EtOH; pH = 8; 24 h; 673 K/H <sub>2</sub> ) | 0,2054                     |
| 3     | Ni <sub>3</sub> Sn <sub>2</sub> (2-Me-EtOH; pH = 8; 48 h; 673 K/H <sub>2</sub> ) | 0,2053                     |
| 4     | Ni <sub>3</sub> Sn <sub>2</sub> (2-Me-EtOH; pH = 8; 72 h; 673 K/H <sub>2</sub> ) | 0,2055                     |

<sup>a</sup>The basal spacing was calculated using Bragg's equation at 2θ = ~44.2 (Ni<sub>3</sub>Sn<sub>2</sub> (110) phase).

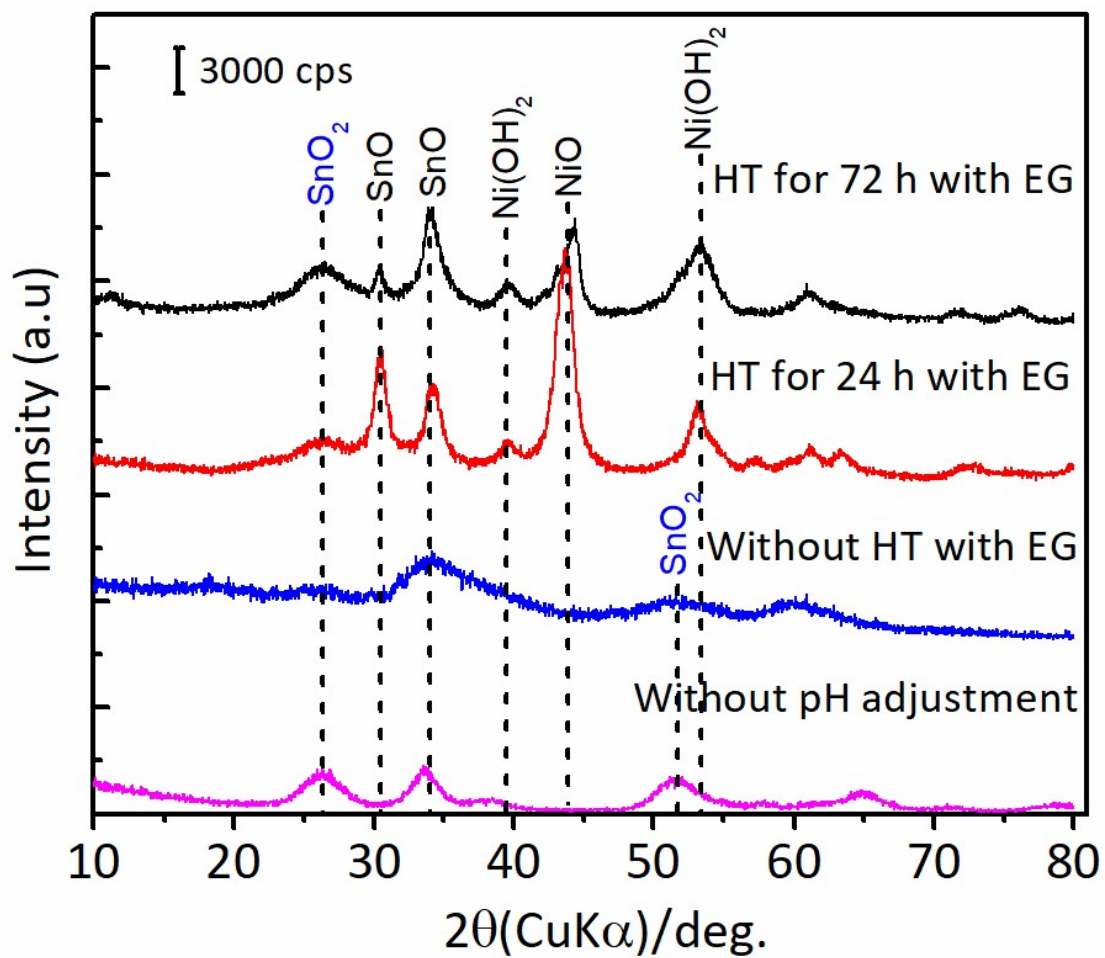

**Figure S2.** XRD patterns of the as-prepared bulk Ni-Sn(1.5) with different conditions.

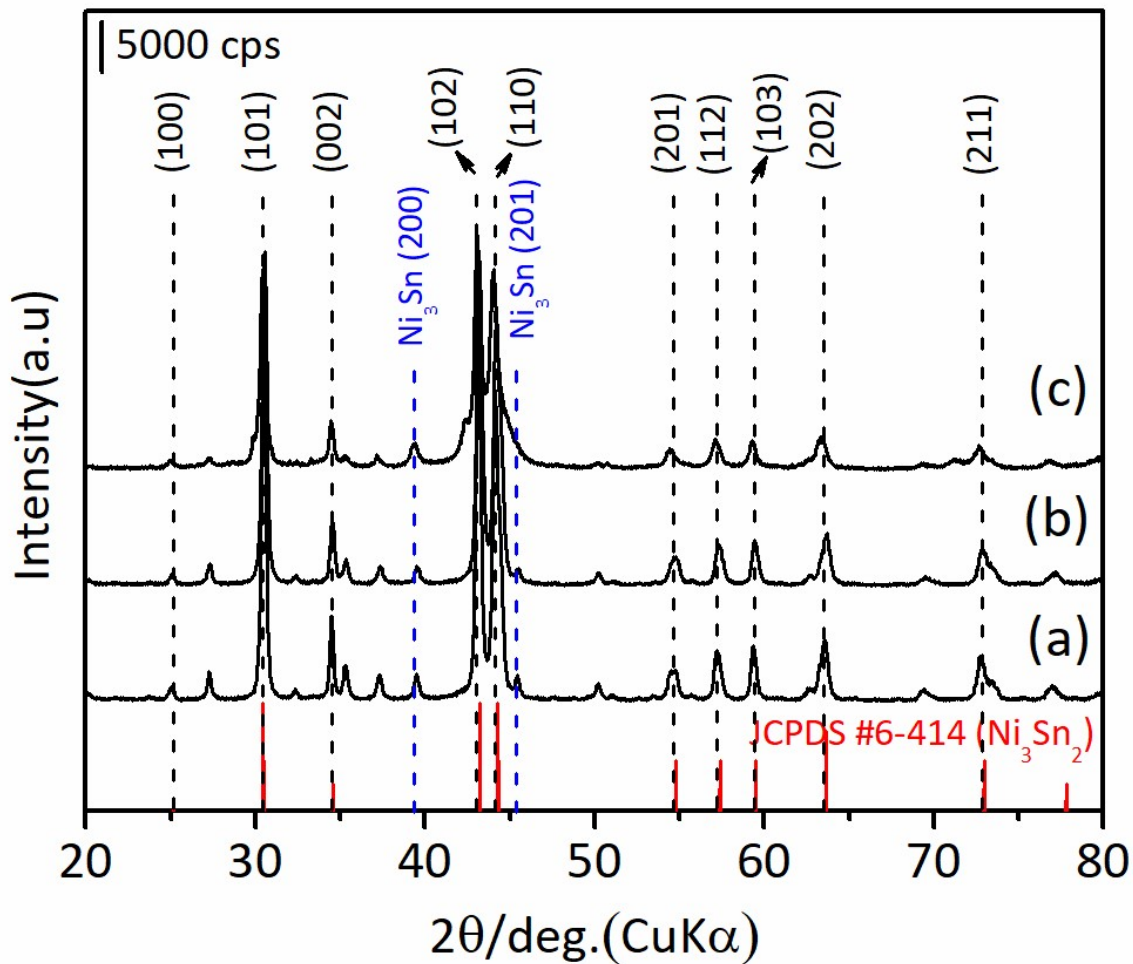

**Figure S3.** XRD patterns of the bulk Ni-Sn(1.5) synthesized in the presence of polyols (a) ethylene glycol (EG), (b) 2-methoxyethanol, and (c) without the addition of polyols during the hydrothermal at 423 K for 24 h, followed by reduction with H<sub>2</sub> at 673 K for 1.5 h.

**Table S5** calculated lattice parameter ( $d$  (nm)) of Ni<sub>3</sub>Sn<sub>2</sub> samples obtained at the effect of EG, methoxy ethanol, and without polyol additives. The data referred to the XRD patterns in Fig. S3 at  $2\theta = \sim 44.2$  (Ni<sub>3</sub>Sn<sub>2</sub> (110) phase).

| Entry | Sample                                                                     | $d^a$ (nm) |
|-------|----------------------------------------------------------------------------|------------|
| 1     | Ni <sub>3</sub> Sn <sub>2</sub> (without polyol; 673 K/H <sub>2</sub> )    | 0,2056     |
| 2     | Ni <sub>3</sub> Sn <sub>2</sub> (2-Me-EtOH; pH = 8; 673 K/H <sub>2</sub> ) | 0,2054     |
| 3     | Ni <sub>3</sub> Sn <sub>2</sub> (EG; pH = 8; 673 K/H <sub>2</sub> )        | 0,2050     |

<sup>a</sup>The basal spacing was calculated using Bragg's equation at  $2\theta = \sim 44.2$  (Ni<sub>3</sub>Sn<sub>2</sub> (110) phase).

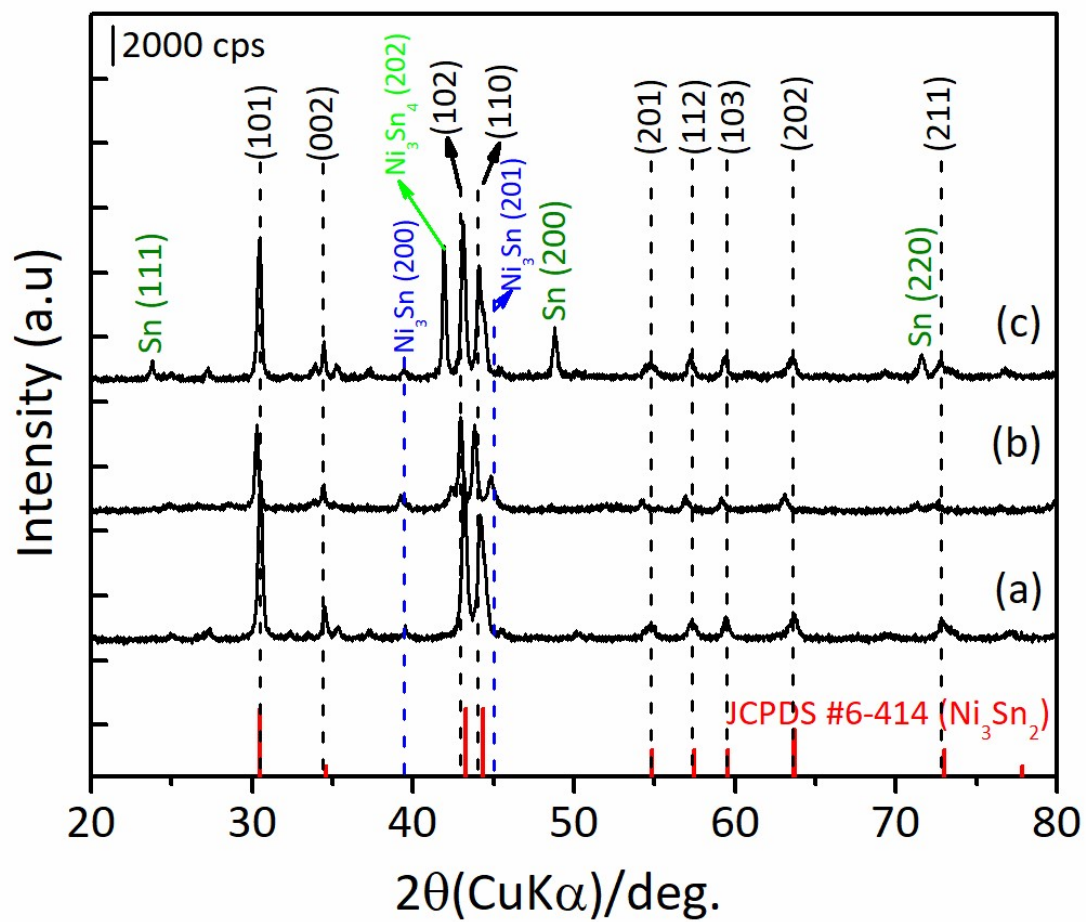

**Figure S4.** XRD patterns of the bulk Ni-Sn(1.5) synthesized at different temperature of hydrothermal (a) 423 K, (b) 473 K, and (c) 523 K for 24 h followed by reduction with  $\text{H}_2$  at 673 K for 1.5 h.

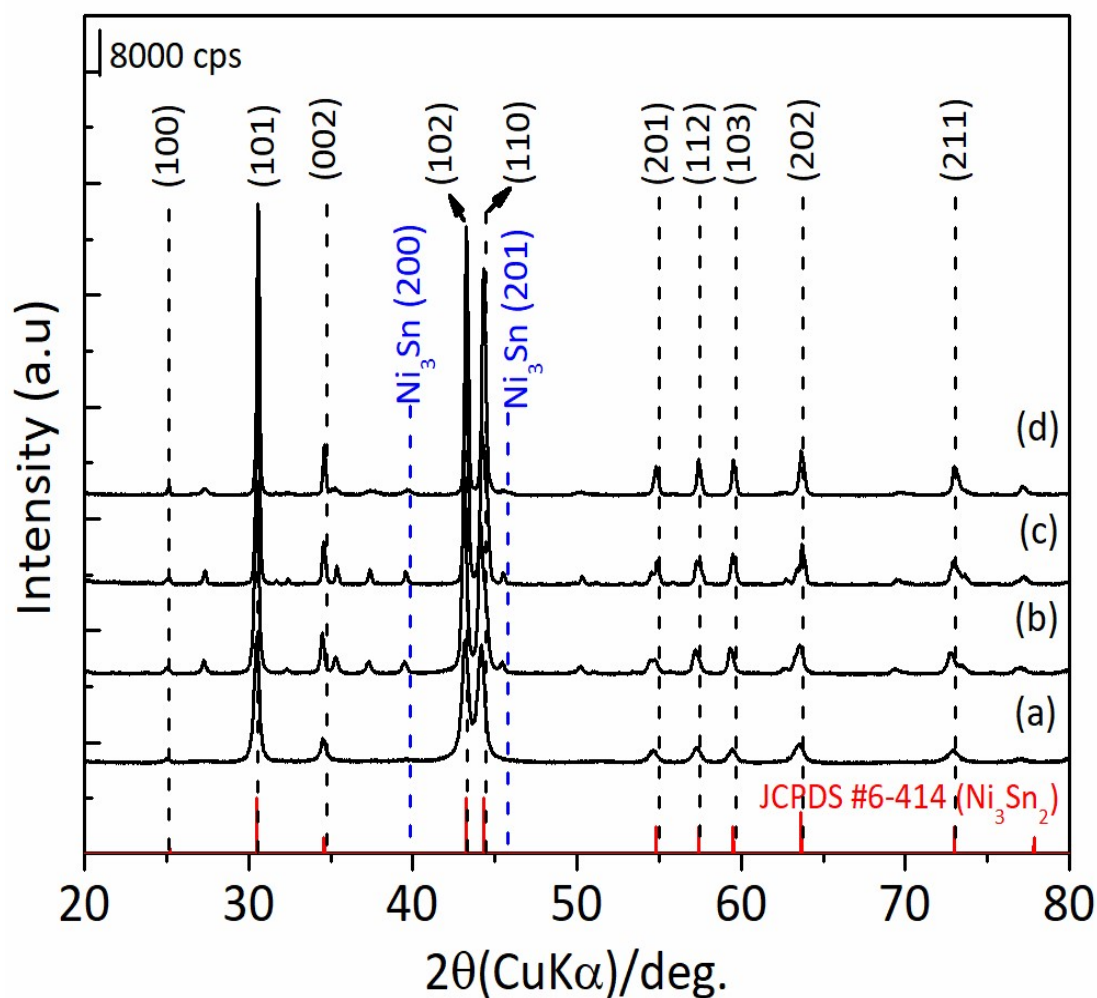

**Figure S5.** XRD patterns of bulk Ni-Sn(1.5) after reduction with  $H_2$  at (a) 573 K, (b) 673 K, (c) 773 K, and (d) 873 K for 1.5 h. The plotted data were compared with JCPDS card of #06-414 ( $Ni_3Sn_2$ ).

**Table S6** Calculated lattice parameters ( $d$ /nm) of  $Ni_3Sn_2$  alloy obtained at reduction temperature. The data referred to the XRD patterns in Fig. S5 at  $2\theta = \sim 44.2$  ( $Ni_3Sn_2$  (110) phase).

| Entry | Sample                                              | $d^a$ (nm) |
|-------|-----------------------------------------------------|------------|
| 1     | $Ni_3Sn_2$ (2-Me-EtOH; pH = 8; 24 h; 573 K/ $H_2$ ) | 0,2049     |
| 2     | $Ni_3Sn_2$ (2-Me-EtOH; pH = 8; 24 h; 673 K/ $H_2$ ) | 0,2054     |
| 3     | $Ni_3Sn_2$ (2-Me-EtOH; pH = 8; 24 h; 773 K/ $H_2$ ) | 0,2051     |
| 4     | $Ni_3Sn_2$ (2-Me-EtOH; pH = 8; 24 h; 873 K/ $H_2$ ) | 0,2045     |

<sup>a</sup>The basal spacing was calculated using Bragg's equation at  $2\theta = \sim 44.2$  ( $Ni_3Sn_2$  (110) phase).

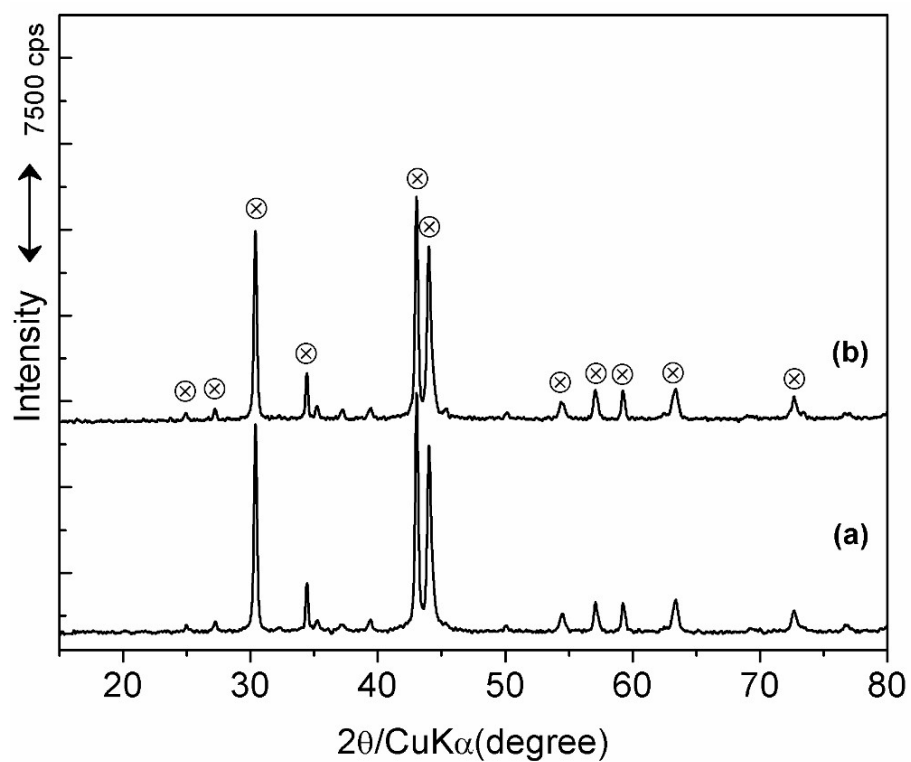

**Figure S6.** XRD patterns of (a) fresh  $\text{Ni}_3\text{Sn}_2$  pH = 8 and (b) recovered after the fourth reaction run in batch reactor system after reduction with  $\text{H}_2$  at 673 K for 1 h. ⊗  $\text{Ni}_3\text{Sn}_2$  alloy phase, plotted data were compared with JCPDS card of #06-414 ( $\text{Ni}_3\text{Sn}_2$ ).
